# Supplementary material
Source: PubMed Central journal article supplement (PMC2845528)
Supplement: NIHMS170798-supplement-Sup_material.pdf [file NIHMS170798-supplement-Sup_material.pdf]

## 1 Appendix A: The birth-death equations

In the birth-death stage, a finite length birth-death process is created where a birth of a pulse pair occurs with rate  $\beta(\theta)$  and a death of pulse pair,  $j$ , occurs with rate  $\delta_j(\theta)$ . The total death rate is then  $\delta(\theta) = \sum_j \delta_j(\theta)$ . The time between a birth or a death event is exponentially distributed with mean,  $\{\beta(\theta) + \delta(\theta)\}^{-1}$ . An event is a birth with probability  $\beta(\theta)/\{\beta(\theta) + \delta(\theta)\}$  and a death with probability  $\delta(\theta)/\{\beta(\theta) + \delta(\theta)\}$ . When the event is a birth, the parameters defining the new pulse pair are drawn from distribution  $b(\theta)$ . In our case, a pulse pair is added and the parameters defining the pulse pair (driver location and lag time and the pulse masses and widths) are drawn from specified distributions. The pulse masses and lags are drawn from their prior distributions, and the driver pulse locations are drawn from a  $U[a, b]$ ; *i.e.*,

$$b(\theta) = \frac{1}{(b-a)} \frac{\beta^\alpha}{\Gamma(\alpha)} \tau^{\alpha-1} \times \\ \exp\{-\beta\tau\} \frac{1}{2\pi} |\kappa_{1i}^{-1} \Sigma_m|^{-1/2} \exp\{(\mathbf{A} - \boldsymbol{\mu}_m)' \kappa_{i1} \Sigma_m^{-1} (\mathbf{A} - \boldsymbol{\mu}_m)\} I_{R^{2+}}(A) \\ \times \frac{1}{2\pi} |\kappa_{2i}^{-1} \Sigma_w|^{-1/2} \exp\{(\boldsymbol{\sigma}_w^2 - \boldsymbol{\mu}_w)' \kappa_{i2} \Sigma_w^{-1} (\boldsymbol{\sigma}_w^2 - \boldsymbol{\mu}_w)\} I_{R^{2+}}(\sigma_w^2)$$

In  $b(\theta)$ ,  $\mathbf{A} = (A_x, A_y)'$ ,  $\boldsymbol{\sigma}_w^2 = (\sigma_{xw}^2, \sigma_{yw}^2)'$ . If we assume  $\beta(\theta)$  is a constant,  $\lambda_b$ , as suggested by Stephens (2000a), then the death rate,  $\lambda_j(w)$ , for each pulse pair is:

$$\delta_j = \lambda_b b(\theta) \frac{L_{-j} p(k-1|\lambda) p(t_{x1} \dots t_{x,k-1} | a, b) \prod_{i=1}^{k-1} p(\mathbf{A}_i | \mu_i, \Sigma_m) p(\tau_k | \alpha, \beta)}{L p(k|\lambda) p(t_{x1} \dots t_{x,k} | a, b) \prod_{i=1}^k p(\mathbf{A}_i | \mu_i, \Sigma_m) p(\tau_k | \alpha, \beta) k} \\ = \frac{\lambda_b L_{-j}}{\lambda L} \frac{(t_{x,j+1} - t_{xj})(b-a)}{(t_{xj} - t_{x,j-1})(t_{x,j+1} - t_{xj})(4k+2)} \quad (1)$$

where  $L_{-j}$  is the likelihood with the  $j$ th pulse removed. The probability of a particular pulse pair dying is  $\delta_j/\delta$  and randomly chosen according to a multinomial.

Web-based Supplementary Materials for "A Bayesian approach to modeling associations between pulsatile hormones," by Nichole E. Carlson, Timothy D. Johnson and Morton B. Brown.

---

## 2 Appendix B: Post simulation processing algorithm

When combining two secretion events into one event, we applied the following algorithm. We based this algorithm on the combine move of the split and combine moves in reversible jump MCMC algorithm for mixture distributions (Richardson and Green, 1997).

$$\begin{aligned}A_{\bullet,i'} &= A_{\bullet,i} + A_{\bullet,i+1} \\A_{\bullet,i'}t_{\bullet,i'} &= (A_{\bullet,i}t_{\bullet,i} + A_{\bullet,i+1}t_{\bullet,i+1}) \\ \tau_{i'} &= t_{y,i'} - t_{x,i'}\end{aligned}$$

Table 1: Posterior means for the pulses masses in the bivariate and univariate BDMCMC estimates for the FSH series in the LH-FSH dataset in the full text.

|          | FSH       |      |            |      |
|----------|-----------|------|------------|------|
|          | Bivariate |      | Univariate |      |
|          | Location  | Mass | Location   | Mass |
| Pulse 1  | 68.5      | 0.58 | –          | –    |
| Pulse 2  | 156.18    | 0.61 | 162.54     | 0.43 |
| Pulse 3  | 280.17    | 1.17 | 309.98     | 0.78 |
| Pulse 4  | 338.08    | 0.26 | –          | –    |
| Pulse 5  | 391.36    | 1.24 | 414.50     | 0.94 |
| Pulse 6  | 467.68    | 0.75 | –          | –    |
| Pulse 7  | 516.06    | 0.42 | 514.56     | 0.54 |
| Pulse 8  | 611.16    | 0.38 | –          | –    |
| Pulse 9  | 670.96    | 0.33 | –          | –    |
| Pulse 10 | 714.18    | 0.48 | 721.94     | 0.47 |
| Pulse 11 | 778.87    | 0.39 | –          | –    |
| Pulse 12 | 824.67    | 0.32 | –          | –    |
| Pulse 13 | 860.51    | 0.66 | 869.05     | 0.61 |
| Pulse 14 | 914.02    | 0.68 | –          | –    |
| Pulse 15 | 952.88    | 0.64 | 937.79     | 0.66 |
| Pulse 16 | 997.70    | 0.50 | 1002.33    | 0.56 |
| Pulse 17 | 1037.52   | 0.29 | –          | –    |
| Pulse 18 | 1099.69   | 0.37 | –          | –    |
| Pulse 19 | 1146.12   | 0.49 | 1158.96    | 0.48 |
| Pulse 20 | 1210.80   | 0.78 | –          | –    |
| Pulse 21 | 1278.65   | 0.63 | 1270.69    | 0.54 |
| Pulse 22 | 1357.77   | 0.62 | 1368.89    | 0.55 |
| Pulse 23 | 1387.19   | 0.39 | –          | –    |

Table 2: Summary statistics for the common parameters for the example simulated series from the bivariate and univariate fits: Mean=mean of the posterior and CI=credible interval

| Parameter                       | LH                             |                                | FSH                    |                               |
|---------------------------------|--------------------------------|--------------------------------|------------------------|-------------------------------|
|                                 | Bivariate                      | Univariate                     | Bivariate              | Univariate                    |
| No. Pulses                      | Mean (95% CI)<br>15.09 (15,16) | Mean (95% CI)<br>15.09 (14,16) | Mean (95% CI)<br>-     | Mean (95% CI)<br>10.44 (6,17) |
| Baseline <sup>a</sup>           | 0.70 (0.08,1.30)               | 0.64 (0.04,1.28)               | 2.27 (0.42,3.25)       | 2.51 (0.58,3.38)              |
| Half-Life <sup>b</sup>          | 63.75 (50.19,79.52)            | 66.10 (51.10,84.17)            | 309.01 (189.34,558.94) | 601.86 (339.03,895.94)        |
| Pulse Width <sup>c</sup>        | 5.32 (0.66,15.48)              | 5.59 (0.53,16.46)              | 29.28 (0.22,170.59)    | 48.83 (0.24,308.10)           |
| Total pulse sec. <sup>a</sup>   | 62.09 (53.74,70.78)            | 61.01 (50.94,70.61)            | 10.22 (7.75,13.33)     | 5.56 (3.96,88.68)             |
| Mean of Lag Dist'n <sup>b</sup> | 16.13 (11.41,20.90)            | -                              | -                      | -                             |
| Mean Log(Pulse) Mass            | 1.38 (1.17,1.57)               | 1.36 (1.11,1.57)               | -0.47 (-0.88,-0.12)    | -0.75 (-1.70,-0.20)           |
| Log(Pulse) Mass Var             | 0.06 (0.02,0.15)               | 0.10 (0.03,0.24)               | 0.16 (0.04,0.45)       | 0.51 (0.02,2.50)              |
| Mass Correlation                | 0.76 (0.35,0.95)               | -                              | -                      | -                             |

<sup>a</sup>units=ng/mL

<sup>b</sup>units=minutes

<sup>c</sup>units=minutes<sup>2</sup>
